# Supplementary material
Source: PubMed Central journal article supplement (PMC2857107)
Supplement: supp_M110.100420_jbc.M110.100420-1.pdf [file supp_M110.100420_jbc.M110.100420-1.pdf]

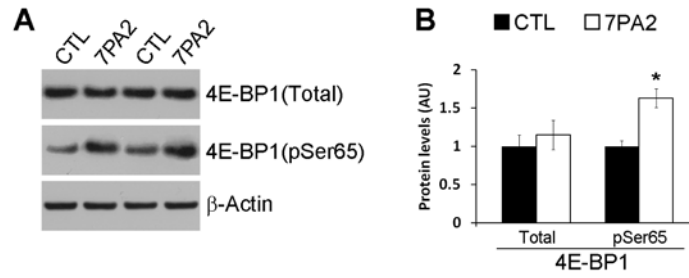

**Supplemental Figure 1.  $A\beta$  increases mTOR signaling in 7AP2 cells.** (A) Representative Western blots of proteins extracted from control or 7PA2 cells and probed with total and phospho-specific anti mTOR and p70S6K antibodies. (B) Densitometric analysis of the blots (normalized to  $\beta$ -Actin) showed that the levels of total 4E-BP1 were similar between control and 7PA2 cells. In contrast, the levels of phosphorylated 4E-BP1 at Ser65 were significantly. For all the experiments shown here, cells were grown in triplicates in three independent experiments; thus, we analyzed a total of 9 samples for each cell line. Data are presented as means  $\pm$  SEM. Protein levels are expressed as arbitrary units. \*indicates  $p < 0.05$ .
